# Supplementary material for: Cancer-secreted AGR2 induces programmed cell death in normal cells
Source: PubMed Central journal article supplement (PMC5226518; doi:10.18632/oncotarget.9921), 2016-06-08
Supplement: oncotarget-07-49425-s001.pdf [file oncotarget-07-49425-s001.pdf]

## Cancer-secreted AGR2 induces programmed cell death in normal cells

### SUPPLEMENTARY TABLE

**Supplementary Table S1: Affymetrix probesets and gene names.** Highlighted entries are genes down-regulated in NP strom + LuCaP 145.1

See Supplementary File 1
